# Supplementary material for: Circ6401, a novel circular RNA, is implicated in repair of the damaged endometrium by Wharton’s jelly-derived mesenchymal stem cells through regulation of the miR-29b-1-5p/RAP1B axis
Source: PubMed Central journal article supplement (PMC7708228; doi:10.1186/s13287-020-02027-5), 2020-12-01

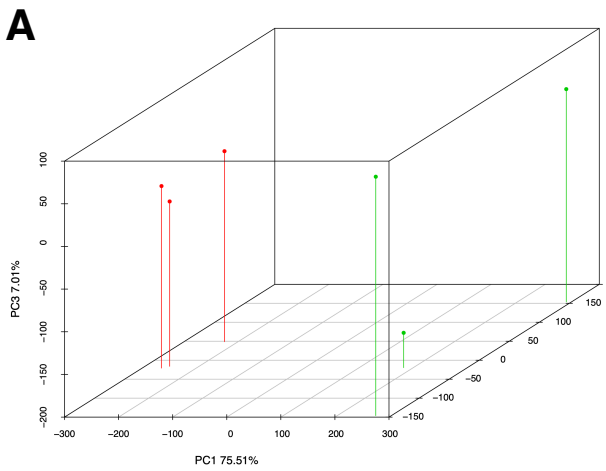

circRNA microarray samples

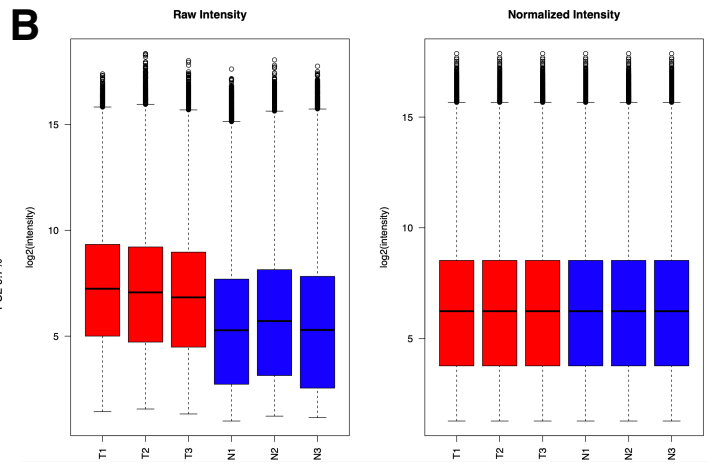

circRNA microarray samples

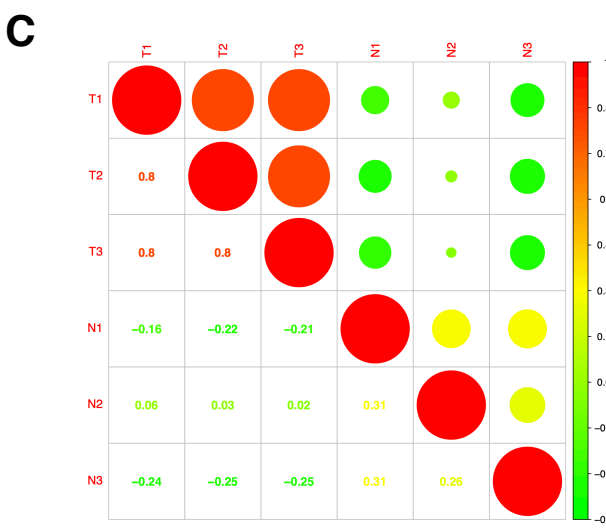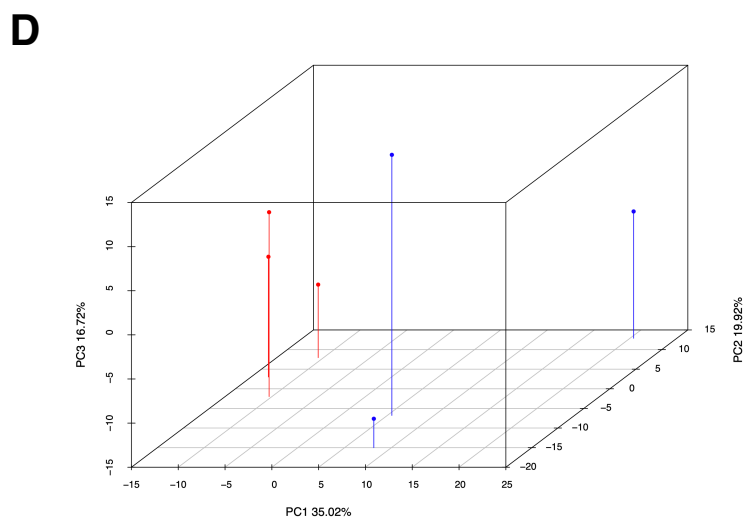

miRNA microarray samples

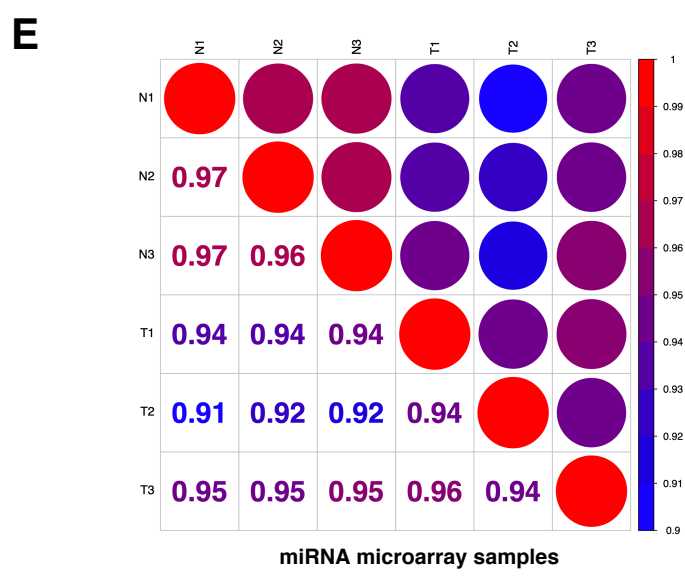

Supplement: 13287_2020_2027_MOESM1_ESM.pdf [file 13287_2020_2027_MOESM1_ESM.pdf]
